# Supplementary material
Source: HighWire-hosted journal article supplement (https://cmajopen.ca/highwire/filestream/84650/field_highwire_adjunct_files/0/2020-0168-1-at.pdf)
Supplement: 2020-0168-1-at.pdf [file 2020-0168-1-at.pdf]

Appendix 1 (as supplied by the authors): Supplemental material

Supplemental Figure S1: Histogram Of Visit Numbers For Top 10% Frequent User Patients From April 1<sup>st</sup> 2012-March 31<sup>st</sup> 2016 (# Visits >25 Make Up <1% Of Total Visits)

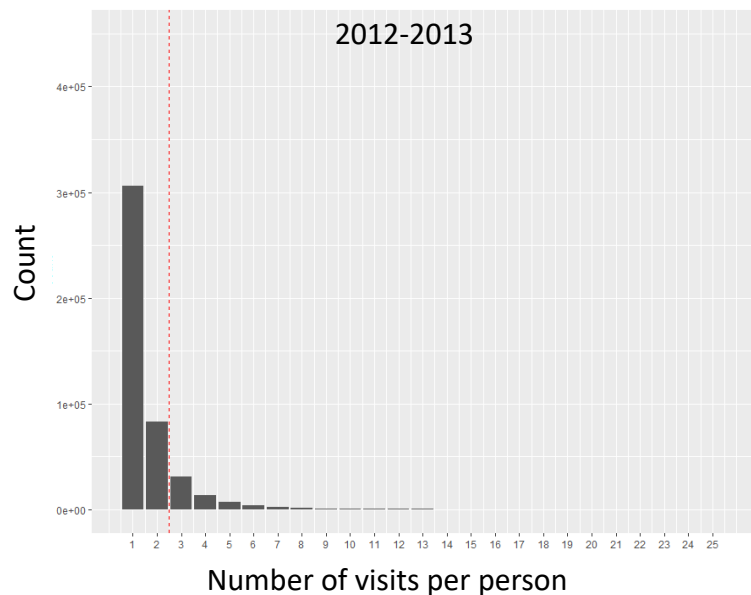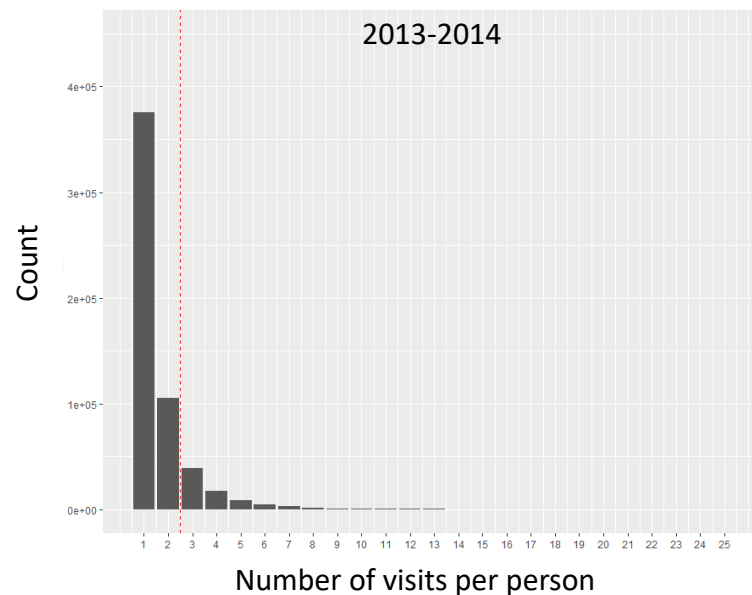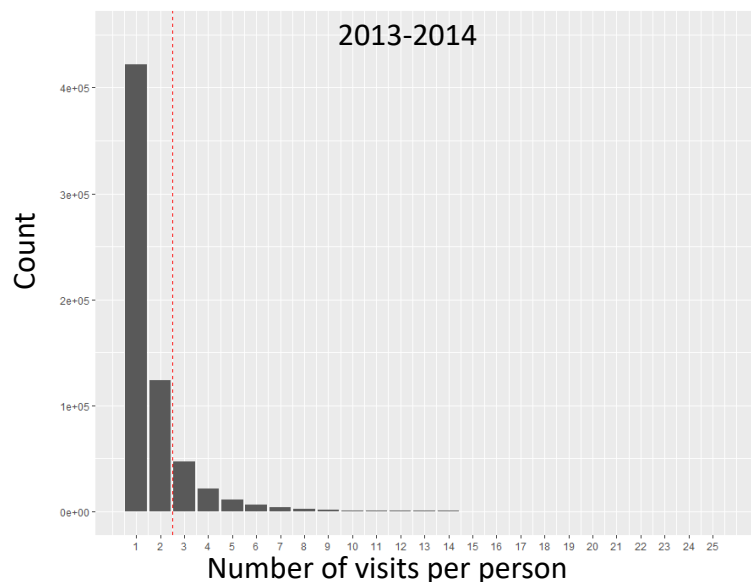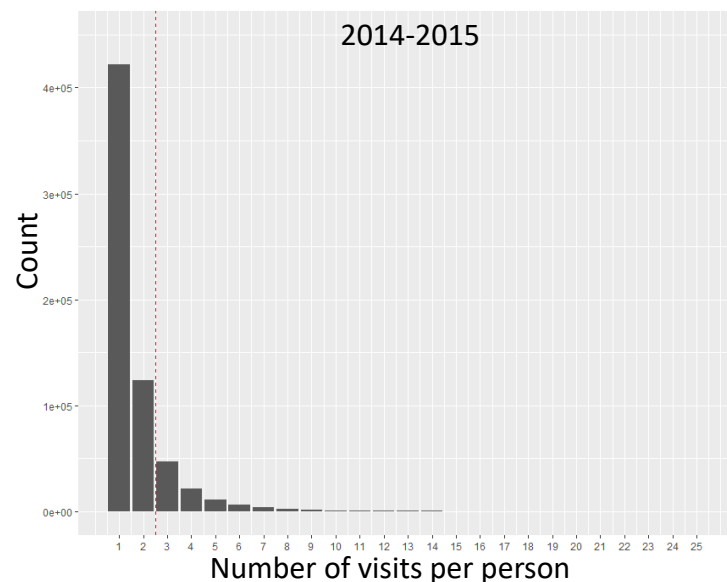

**Supplemental Table S1: Breakdown of Diagnoses of Mental Health-Related ED Visits Made By All Frequent Users and Those Under 60**

| <b><u>All Frequent Users</u></b>                                                                       | <b>2012-2013<br/>N (%)</b> | <b>2013-2014<br/>N (%)</b> | <b>2014-2015<br/>N (%)</b> | <b>2015-2016<br/>N (%)</b> |
|--------------------------------------------------------------------------------------------------------|----------------------------|----------------------------|----------------------------|----------------------------|
| <b><u>Number of mental health disorders</u></b>                                                        | 13,344                     | 19,103                     | 24,023                     | 28,391                     |
| Mental disorders due to known physiological conditions (F01-F09)                                       | 672 (5.0)                  | 1,067 (5.6)                | 1,617 (6.7)                | 1,626 (5.7)                |
| Mental and behavioral disorders due to psychoactive substance use (F10-F19)                            | 4,629 (34.7)               | 6,592 (34.5)               | 8,202 (34.1)               | 10,807 (38.1)              |
| Schizophrenia, schizotypal, delusional, and other non-mood psychotic disorders (F20-F29)               | 2,229 (16.7)               | 3,089 (16.2)               | 3,841 (16.0)               | 4,387 (15.5)               |
| Mood [affective] disorders (F30-F39)                                                                   | 2,099 (15.7)               | 2,859 (15.0)               | 3,428 (14.3)               | 3,448 (12.1)               |
| Anxiety, dissociative, stress-related, somatoform and other nonpsychotic mental disorders (F40-F48)    | 2232 (16.6)                | 3520 (18.4)                | 4499 (18.7)                | 5226 (18.4)                |
| Behavioral syndromes associated with physiological disturbances and physical factors (F50-F59)         | 37 (0.3)                   | 53 (0.3)                   | 51 (0.2)                   | 34 (0.1)                   |
| Disorders of adult personality and behavior (F60-F69)                                                  | 213 (1.6)                  | 349 (1.8)                  | 361 (1.5)                  | 377 (1.3)                  |
| Intellectual disabilities (F70-F79)                                                                    | 0 (0.0)                    | 0 (0.0)                    | 0 (0.0)                    | 0 (0.0)                    |
| Pervasive and specific developmental disorders (F80-F89)                                               | 0 (0.0)                    | 0 (0.0)                    | 0 (0.0)                    | 0 (0.0)                    |
| Behavioral and emotional disorders with onset usually occurring in childhood and adolescence (F90-F98) | 0 (0.0)                    | 0 (0.0)                    | 0 (0.0)                    | 0 (0.0)                    |
| Unspecified mental disorder (F99)                                                                      | 1,233 (9.2)                | 1,574 (8.2)                | 2,024 (8.4)                | 2,486 (8.8)                |
| <b><u>Frequent Users Under 60 Years Old</u></b>                                                        |                            |                            |                            |                            |
| <b><u>Number of mental health disorders</u></b>                                                        | 11,225                     | 15,565                     | 19,345                     | 23,153                     |
| Mental disorders due to known physiological conditions (F01-F09)                                       | 118 (1.1)                  | 164 (1.1)                  | 234 (1.2)                  | 197 (0.9)                  |
| Mental and behavioral disorders due to psychoactive substance use (F10-F19)                            | 4,083 (36.4)               | 5,705 (36.7)               | 7,140 (36.7)               | 9,431 (40.7)               |
| Schizophrenia, schizotypal, delusional, and other non-mood psychotic disorders (F20-F29)               | 2,051 (18.3)               | 2,837 (18.2)               | 3,533 (18.3)               | 4,046 (17.5)               |
| Mood [affective] disorders (F30-F39)                                                                   | 1,819 (16.2)               | 2,432 (15.6)               | 2,894 (15.0)               | 2,877 (12.4)               |

|                                                                                                        |               |               |               |               |
|--------------------------------------------------------------------------------------------------------|---------------|---------------|---------------|---------------|
| Anxiety, dissociative, stress-related, somatoform and other nonpsychotic mental disorders (F40-F48)    | 1,809 (16.0)  | 2,674 (17.2)  | 3,399 (17.6)  | 4,042 (17.5)  |
| Behavioral syndromes associated with physiological disturbances and physical factors (F50-F59)         | 34 (0.3)      | 52 (0.3)      | 48 (0.2)      | 31 (0.1)      |
| Disorders of adult personality and behavior (F60-F69)                                                  | 199 (1.8)     | 320 (2.1)     | 335 (1.7)     | 361 (1.6)     |
| Intellectual disabilities (F70-F79)                                                                    | 0 (0.0)       | 0 (0.0)       | 0 (0.0)       | 0 (0.0)       |
| Pervasive and specific developmental disorders (F80-F89)                                               | 0 (0.0)       | 0 (0.0)       | 0 (0.0)       | 0 (0.0)       |
| Behavioral and emotional disorders with onset usually occurring in childhood and adolescence (F90-F98) | 0 (0.0)       | 0 (0.0)       | 0 (0.0)       | 0 (0.0)       |
| Unspecified mental disorder (F99)                                                                      | 1,112 (9.9)   | 1,381 (8.9)   | 1,762 (9.1)   | 2,168 (9.4)   |
| <b><i>Number of Opioid Prescriptions in Pharmanet</i></b>                                              |               |               |               |               |
| Total number of prescriptions (AHFS* 28:08:08)                                                         | 188,528 (8.4) | 207,180 (7.8) | 226,270 (7.5) | 216,247 (6.8) |
| Number of opioid prescriptions per person, median (Q1, Q3)                                             | 1 (1, 2)      | 1 (1, 2)      | 1 (1, 2)      | 1 (1, 2)      |
| Max number of opioid prescriptions per person                                                          | 9             | 12            | 9             | 8             |

\*Footnote: abbreviation: American Hospital Formulary Service (AHFS).

**Supplemental Table S2: Characteristics Of ED Visits Made By Frequent Users By Age Category**

| <b>Top five ED Visit Diagnostic Categories<br/>(non missing), by age category</b> | <b>April 1<sup>st</sup><br/>2012- March<br/>31<sup>st</sup> 2013</b> | <b>April 1<sup>st</sup><br/>2013- March<br/>31<sup>st</sup> 2014</b> | <b>April 1<sup>st</sup><br/>2014- March<br/>31<sup>st</sup> 2015</b> | <b>April 1<sup>st</sup><br/>2015- March<br/>31<sup>st</sup> 2016</b> |
|-----------------------------------------------------------------------------------|----------------------------------------------------------------------|----------------------------------------------------------------------|----------------------------------------------------------------------|----------------------------------------------------------------------|
|                                                                                   | <b>N (%)</b>                                                         | <b>N (%)</b>                                                         | <b>N (%)</b>                                                         | <b>N (%)</b>                                                         |
| <b>Ages: 18-29</b>                                                                |                                                                      |                                                                      |                                                                      |                                                                      |
| <b># of patients</b>                                                              | 48,981                                                               | 61,376                                                               | 75,918                                                               | 80,168                                                               |
| Symptoms, signs and abnormal clinical and laboratory findings (XVIII)             | 7,075 (14.4)                                                         | 10,228 (16.7)                                                        | 13,086 (17.2)                                                        | 13642 (17.0)                                                         |
| Injury, poisoning and certain other consequences of external causes (XIX)         | 6,449 (13.2)                                                         | 8,276 (13.5)                                                         | 10,821 (14.3)                                                        | 11,723 (14.6)                                                        |
| Mental and behavioural disorders (V)                                              | 3,200 (6.5)                                                          | 4,658 (7.6)                                                          | 5,969 (7.9)                                                          | 6,915 (8.6)                                                          |
| Disease of the genitourinary system (XIV)                                         | 2,615 (5.3)                                                          | 3,383 (5.5)                                                          | 4,376 (5.8)                                                          | 4,618 (5.8)                                                          |
| Factors influencing health status and contract with health services (XXI)         | 1,824 (3.7)                                                          | 2,588 (4.2)                                                          | 3,812 (5.0)                                                          | 3,779 (4.7)                                                          |
| NA                                                                                | 18,598 (38.0)                                                        | 19,324 (31.5)                                                        | 21,321 (28.1)                                                        | 22,342 (27.9)                                                        |
| <b>Ages: 30-39</b>                                                                |                                                                      |                                                                      |                                                                      |                                                                      |
| <b># of patients</b>                                                              | 40442                                                                | 51388                                                                | 62230                                                                | 67332                                                                |
| Symptoms, signs and abnormal clinical and laboratory findings (XVIII)             | 6,098 (15.1)                                                         | 8,573 (16.7)                                                         | 10,932 (17.6)                                                        | 11,666 (17.3)                                                        |
| Injury, poisoning and certain other consequences of external causes (XIX)         | 4,636 (11.5)                                                         | 6,250 (12.2)                                                         | 7,842 (12.6)                                                         | 8,778 (13.0)                                                         |
| Mental and behavioural disorders (V)                                              | 2,673 (6.6)                                                          | 3,849 (7.5)                                                          | 4,818 (7.7)                                                          | 5,911 (8.8)                                                          |
| Disease of the genitourinary system (XIV)                                         | 2,278 (5.6)                                                          | 3,001 (5.8)                                                          | 3,736 (6.0)                                                          | 3,866 (5.7)                                                          |
| Factors influencing health status and contract with health services (XXI)         | 1,853 (4.6)                                                          | 2,381 (4.6)                                                          | 3,344 (5.4)                                                          | 3,488 (5.2)                                                          |
| NA                                                                                | 13,844 (34.2)                                                        | 14,676 (28.6)                                                        | 15,605 (25.1)                                                        | 16,452 (24.4)                                                        |
| <b>Ages: 40-49</b>                                                                |                                                                      |                                                                      |                                                                      |                                                                      |
| <b># of patients</b>                                                              | 42,660                                                               | 50,686                                                               | 61,007                                                               | 63,744                                                               |
| Symptoms, signs and abnormal clinical and laboratory findings (XVIII)             | 6,809 (16.0)                                                         | 9,010 (17.8)                                                         | 11,027 (18.1)                                                        | 11,479 (18.0)                                                        |
| Injury, poisoning and certain other consequences of external causes (XIX)         | 4,829 (11.3)                                                         | 6,219 (12.3)                                                         | 7,910 (13.0)                                                         | 7,981 (12.5)                                                         |
| Mental and behavioural disorders (V)                                              | 2,922 (6.8)                                                          | 3,699 (7.3)                                                          | 4,655 (7.6)                                                          | 5,296 (8.3)                                                          |

|                                                                           |               |               |               |               |
|---------------------------------------------------------------------------|---------------|---------------|---------------|---------------|
| Diseases of the musculoskeletal system and connective tissue (XIII)       | 2,220 (5.2)   | 2,858 (5.6)   | 3,489 (5.7)   | 3,728 (5.8)   |
| Factors influencing health status and contract with health services (XXI) | 1,988 (4.7)   | 2,620 (5.2)   | 3,459 (5.7)   | 3,424 (5.4)   |
| NA                                                                        | 14,189 (33.3) | 13,792 (27.2) | 14,686 (24.1) | 14,946 (23.4) |
| <b>Ages: 50-59</b>                                                        |               |               |               |               |
| <b># of patients</b>                                                      | 43,822        | 54,928        | 66,577        | 72,159        |
| Symptoms, signs and abnormal clinical and laboratory findings (XVIII)     | 7,024 (16.0)  | 9,811 (17.9)  | 12,097 (18.2) | 12,761 (17.7) |
| Injury, poisoning and certain other consequences of external causes (XIX) | 4,467 (10.2)  | 6,088 (11.1)  | 7,551 (111.3) | 8,418 (11.7)  |
| Mental and behavioural disorders (V)                                      | 2,430 (5.5)   | 3,359 (6.1)   | 3,903 (5.9)   | 5,031 (7.0)   |
| Diseases of the musculoskeletal system and connective tissue (XIII)       | 2,175 (5.0)   | 2,960 (5.4)   | 3,842 (5.8)   | 4,094 (5.7)   |
| Factors influencing health status and contract with health services (XXI) | 1,867 (4.3)   | 2,562 (4.7)   | 3,590 (5.4)   | 3,808 (5.3)   |
| NA                                                                        | 15,393 (35.1) | 15,699 (28.6) | 17,402 (26.1) | 17,932 (24.9) |
| <b>Ages: 60-69</b>                                                        |               |               |               |               |
| <b># of patients</b>                                                      | 35,862        | 45,176        | 57,453        | 61,694        |
| Symptoms, signs and abnormal clinical and laboratory findings (XVIII)     | 5,978 (16.7)  | 8,289 (18.3)  | 11,025 (19.2) | 11,696 (19.0) |
| Injury, poisoning and certain other consequences of external causes (XIX) | 3,014 (8.4)   | 4,083 (9.0)   | 5,417 (9.4)   | 5,620 (9.1)   |
| Diseases of the circulatory system (IX)                                   | 1,690 (4.7)   | 2,632 (5.8)   | 3,452 (6.0)   | 3,512 (5.7)   |
| Diseases of the Respiratory system (X)                                    | 1,588 (4.4)   | 2,350 (5.2)   | 3,062 (5.3)   | 3,573 (5.8)   |
| Factors influencing health status and contract with health services (XXI) | 1,273 (3.5)   | 2,108 (4.7)   | 3,032 (5.3)   | 3,177 (5.1)   |
| NA                                                                        | 13,245 (36.9) | 13,242 (29.3) | 14,840 (25.8) | 15,713 (25.5) |
| <b>Ages: 70+</b>                                                          |               |               |               |               |
| <b># of patients</b>                                                      | 72,249        | 92,188        | 11,9669       | 12,7506       |
| Symptoms, signs and abnormal clinical and laboratory findings (XVIII)     | 12,016 (16.6) | 17,633 (19.1) | 24,216 (20.2) | 26,003 (20.4) |
| Diseases of the circulatory system (IX)                                   | 46,08 (6.4)   | 7,281 (7.9)   | 10,092 (8.4)  | 10,701 (8.4)  |

|                                                                           |               |               |               |               |
|---------------------------------------------------------------------------|---------------|---------------|---------------|---------------|
| Injury, poisoning and certain other consequences of external causes (XIX) | 5,314 (7.4)   | 7,474 (8.1)   | 10,025 (8.4)  | 10,599 (8.3)  |
| Diseases of the respiratory system (X)                                    | 3,219 (4.4)   | 4,705 (5.1)   | 6,692 (6.6)   | 7,421 (5.8)   |
| Diseases of the digestive system (XI)                                     | 2,677 (3.7)   | 4,182 (4.5)   | 5,474 (4.6)   | 5,732 (4.5)   |
| NA                                                                        | 30,243 (41.9) | 29,189 (31.7) | 32,907 (27.5) | 34,720 (27.2) |

**Footnote:** \*Population from Government of BC  
(<https://www2.gov.bc.ca/gov/content/data/statistics/people-population-community/population/population-estimates>), abbreviations: Emergency Department (ED)
